# Supplementary material for: A Novel D-Psicose 3-Epimerase from Halophilic, Anaerobic Iocasia fonsfrigidae and Its Application in Coconut Water
Source: MDPI journal article supplement (doi:10.3390/ijms24076394), 2023-03-29
Supplement: s1 [file s1]

## Supplementary Materials

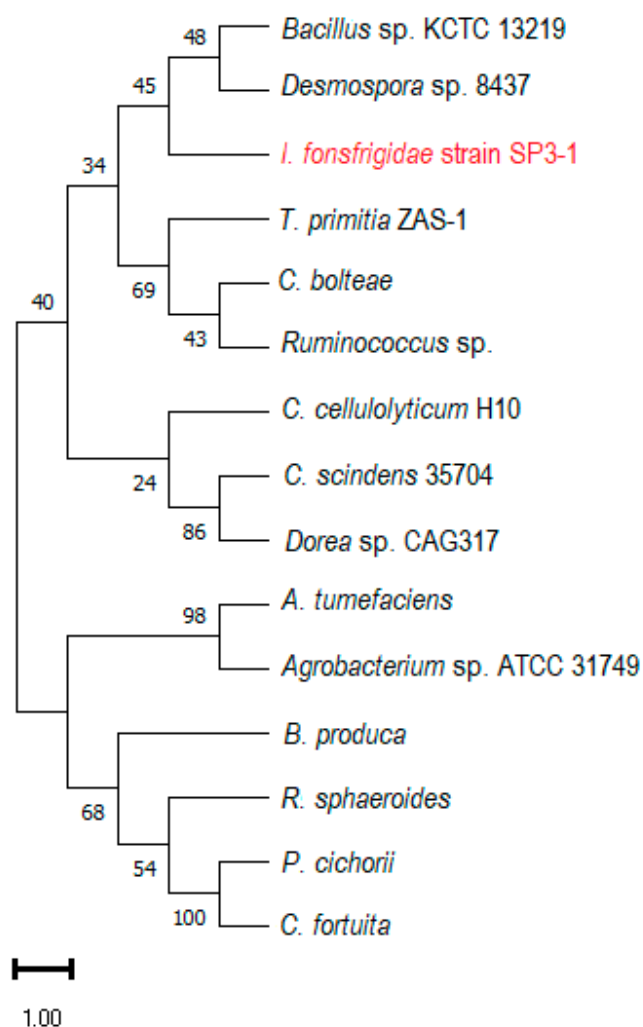

**Figure S1.** Phylogenetic tree analysis of IfDPEase with other characterized related members was constructed using protein sequences in MEGA 11 Program [26] by following Neighbor-Joining method with Jones-Taylor-Thornton (JTT) model + G (1000 Bootstrap). The numbers at the branching points indicated the bootstrap values. The scale for branch length is shown below the tree. Red letter is DPEase from *I. fonsfrigidiae* strain SP3-1 that has high relationship with DPEases from *Bacillus* sp. KCTC 13219, *Desmospora* sp. 8437, *Treponema primitia* ZAS-1, *Clostridium bolteae* 35704, *Ruminococcus* sp., *Clostridium cellulolyticum* H10, *Clostridium scindens* 35704, *Dorea* sp. CAG317, *Agrobacterium tumefaciens*, *Agrobacterium* sp. ATCC 31749, *Blautia produca*; DTEases from *Pseudomonas cichorii* and *Caballeronia fortuita*; and DFEase from *Rhodobacter sphaeroides*.

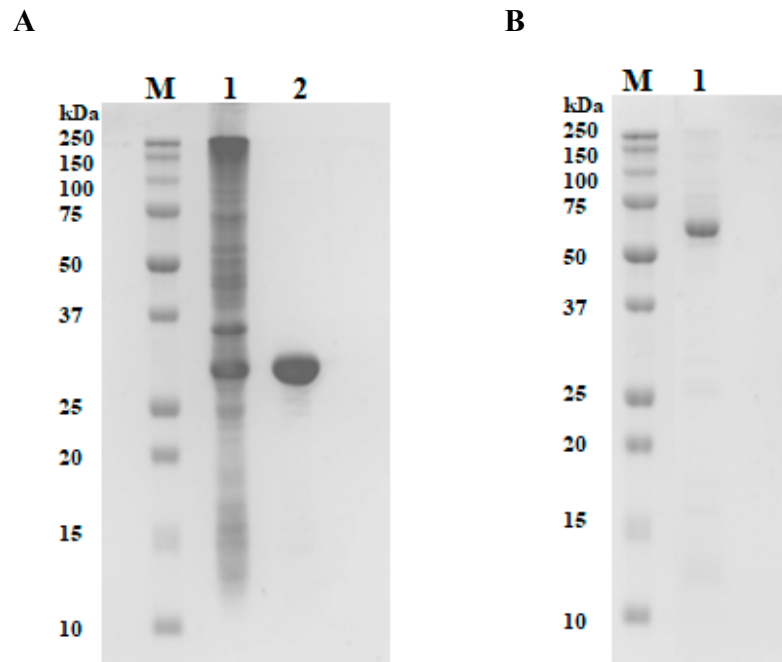

**Figure S2.** (A) SDS-PAGE of crude enzyme (lane 1) and purified IfDPEase (lane 2). (B) Native-PAGE of the purified IfDPEase (lane 1). Lane M is standard marker proteins.

A

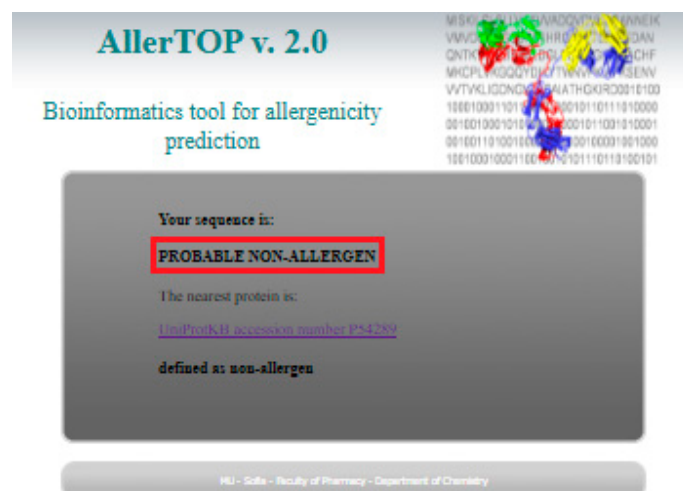

B

|                                                                         |                          |
|-------------------------------------------------------------------------|--------------------------|
| Name of sequence                                                        | IfdPEase                 |
| Length of Sequence                                                      | 269                      |
| Preicted On                                                             | Fri Oct 14 08:52:32 2022 |
| NON ALLERGEN                                                            |                          |
| Prediction by mapping of IgE epitope                                    |                          |
| The protein sequence does not contain experimentally proven IgE epitope |                          |
| Name of sequence                                                        | IfdPEase                 |
| Length of Sequence                                                      | 269                      |
| Preicted On                                                             | Fri Oct 14 08:55:41 2022 |
| Blast RESULT                                                            |                          |
| BLAST Results of ARPS : No Hits found                                   |                          |
| NON ALLERGEN                                                            |                          |

**Figure S3.** The protein allergen for food safety was performed. (A) Using the AllerTOP v.2.0 database by searching for full IfdPEase sequence compare with database (<https://www.ddg-pharmfac.net/AllerTOP/>). (B) Using the Algpred (<http://crdd.osdd.net/raghava/algpred/>) database by comparing sequence in UniProtKB and mapping of IgE epitope. Based on these results, IfdPEase was found to be non-allergenic.

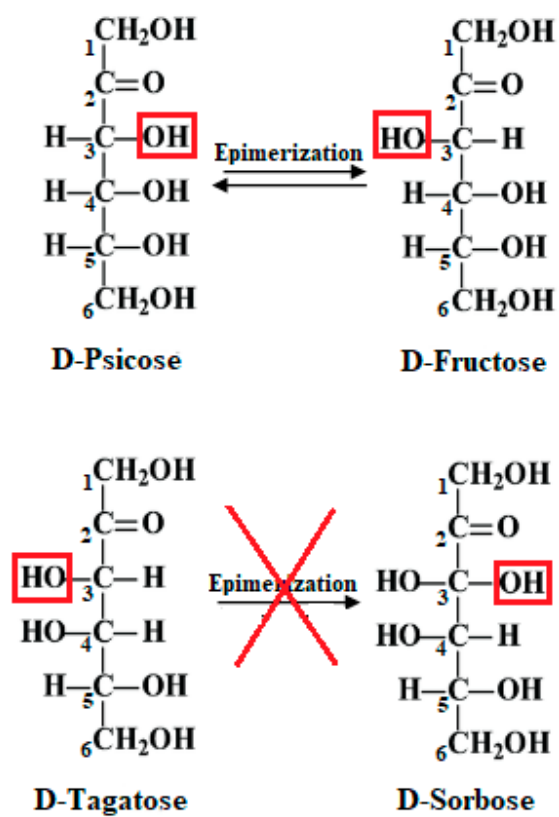

**Figure S4.** Reaction scheme for the catalysis of keto-sugars by IfDPEase

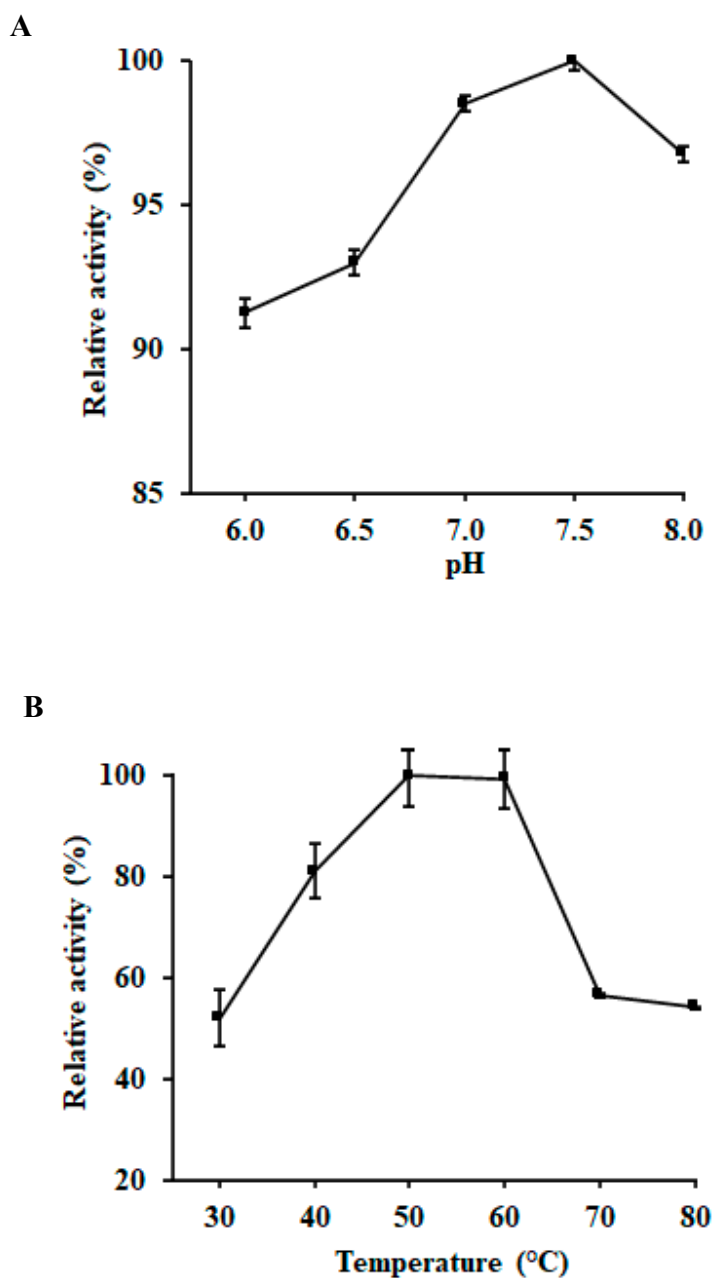

**Figure S5.** (A) Effect of pH on IfDPEase activity was determined by incubating 50  $\mu$ M of purified enzyme with D-fructose (10 mg/mL) containing 1 mM of  $Mn^{2+}$  for 5 min in buffers with a pH range of 6.0-8.0 (sodium phosphate buffer, pH 6.0-7.0; Tris-HCl buffer, pH 7.0-8.0). The reaction was done at 50  $^{\circ}$ C for 5 min. The maximum pH activity of IfDPEase at pH 7.5 was considered as 100% relative activity. (B) Effect of temperature on IfDPEase activity was determined under the conditions described above. The reaction was done with a temperature range of 30 to 80  $^{\circ}$ C, pH

7.5 for 5 min. The maximum temperature activity of IfDPEase at 50 °C was considered as 100% relative activity. Values are mean of three replications  $\pm$  standard deviation.

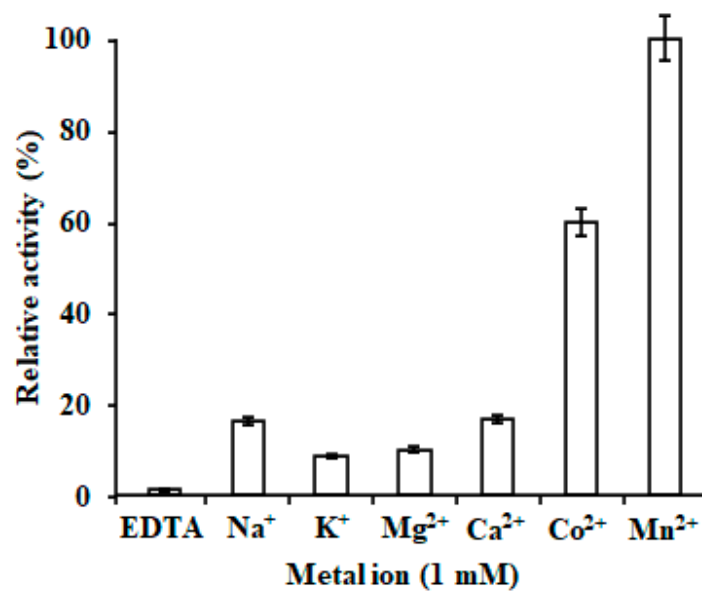

**Figure S6.** Effect of metal ions on IfDPEase activity. The reactions were done with D-fructose (10 mg/mL) and purified enzyme (5  $\mu$ M) at 50 °C, pH 7.5 for 5 min with different metal ions. Metal ions used are Na<sup>+</sup>, K<sup>+</sup>, Mg<sup>2+</sup>, Ca<sup>2+</sup>, Co<sup>2+</sup> and Mn<sup>2+</sup>. The values are shown as percentages of the optimal activity with Mn<sup>2+</sup>, taken as 100% relative activity. Values are the mean of three replications  $\pm$  standard deviation.
